# Supplementary material for: Dysregulated expression of monoacylglycerol lipase is a marker for anti-diabetic drug metformin-targeted therapy to correct impaired neurogenesis and spatial memory in Alzheimer's disease
Source: PubMed Central journal article supplement (PMC7255032; doi:10.7150/thno.44962), 2020-05-15
Supplement: thnov10p6337s1.pdf [file thnov10p6337s1.pdf]

## **SUPPLEMENTAL ITEMS:**

Figure S1. **Mgll protein levels in 3xTg-AD and *CbpS436A* mice hippocampal DG and human post-mortem AD hippocampal DG tissues.**

Figure S2. **JZL 184 and metformin do not significantly change general motor activities of WT and *CbpS436A*, and Non-Tg and 3xTg-AD mice.**

Figure S3. **Metformin treatment removes intracellular  $\beta$ -amyloid accumulation from 3xTg hippocampal dentate gyrus.**

Figure S4. **(A) ChIP-qPCR analysis for CBP binding at Mgll promoter in differentiating WT and *CbpS436A* NPCs in the presence of metformin; (B-D) Efficiency of shRNA-mediated Mgll knockdown.**

Figure S5. **Continued passaging does not change total aPKC protein levels.**

Figure S6. **AMPK protein expression in 3xTg-AD and Non-Tg NPCs.**

Table S1. **Human post-mortem samples information regarding age, sex and post-mortem delay.**

Table S2. **RNA-seq analysis of differentiating WT and *CbpS436A* NPCs in the presence of metformin.**

**Supplementary Materials:**

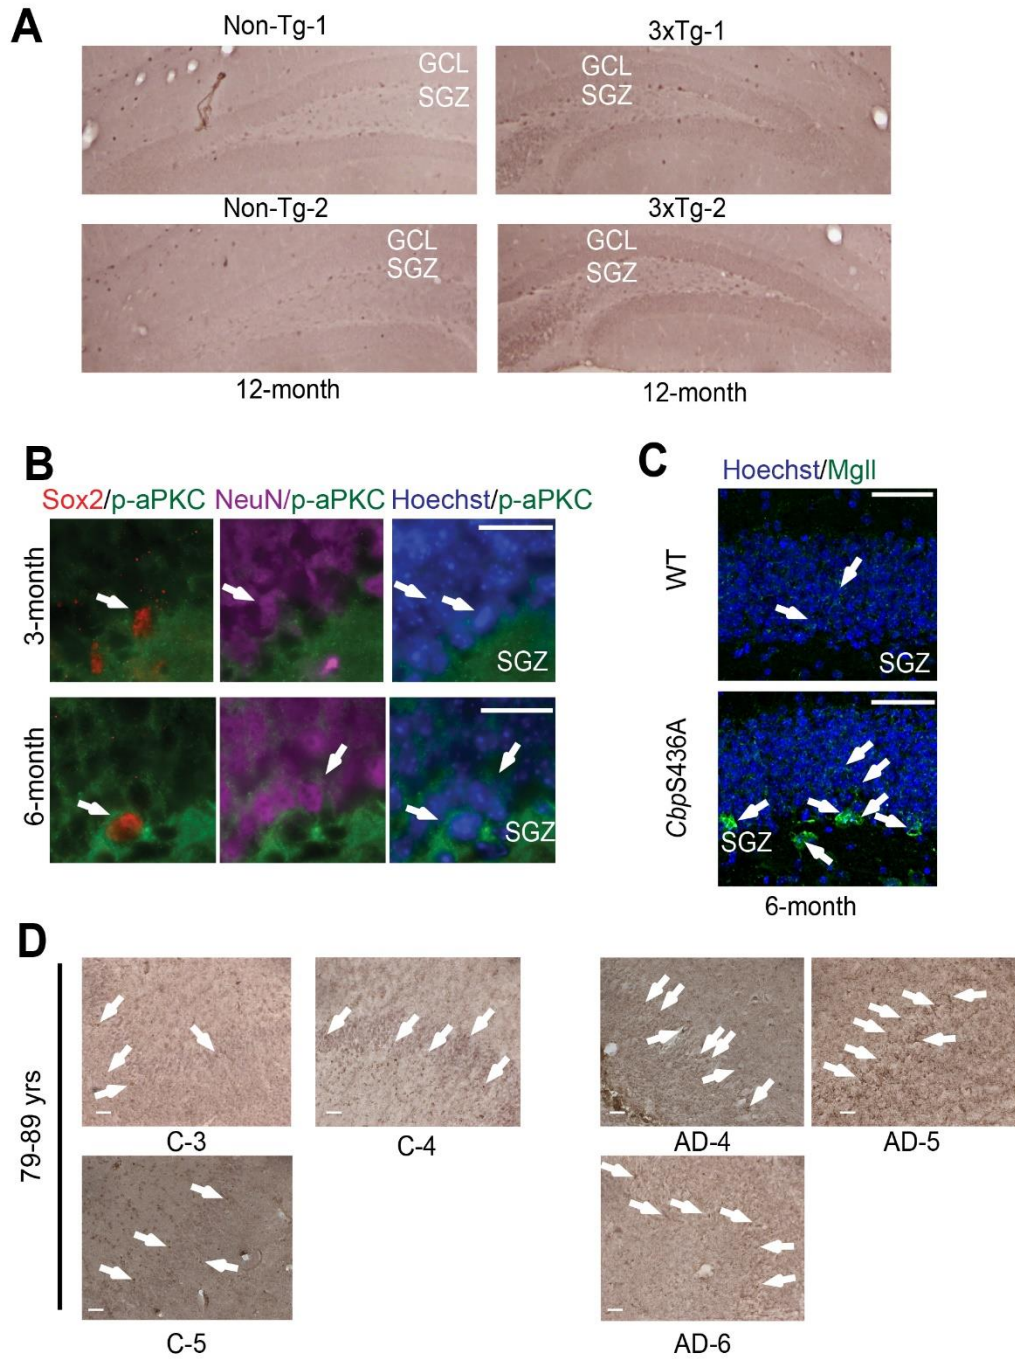

**Figure S1. Mgl1 protein levels in 3xTg-AD and *CbpS436A* mice hippocampal DG and human post-mortem AD hippocampal DG tissues.** (A) Images of 12-month-old Non-Tg and 3xTg-AD hippocampal DG sections immunostained for Mgl1 with DAB staining (n=2 animals/genotype). (B) Images of hippocampal DG (SGZ/GCL layers) sections from 3-month-old and 6-month-old WT mice, immunostained for Sox2 (red), NeuN (purple) and p-aPKC (green) and counterstained with Hoechst (blue). Arrows denote NeuN<sup>+</sup> or Sox2<sup>+</sup> cells; scale bar: 25  $\mu$ m. (C) Images of hippocampal DG sections from 6-month-old WT and *CbpS436A* mice, immunostained for Mgl1 (green) and counterstained with Hoechst (blue). Arrows denote Mgl1<sup>+</sup> cells; scale bar: 25  $\mu$ m. (D) Images of human hippocampal DG sections from AD patients and their age-matched healthy controls (79-89 years) following Mgl1 immunohistochemistry with DAB staining. Arrows denote Mgl1<sup>+</sup> DAB stained cells. Scale bar: 50  $\mu$ m.

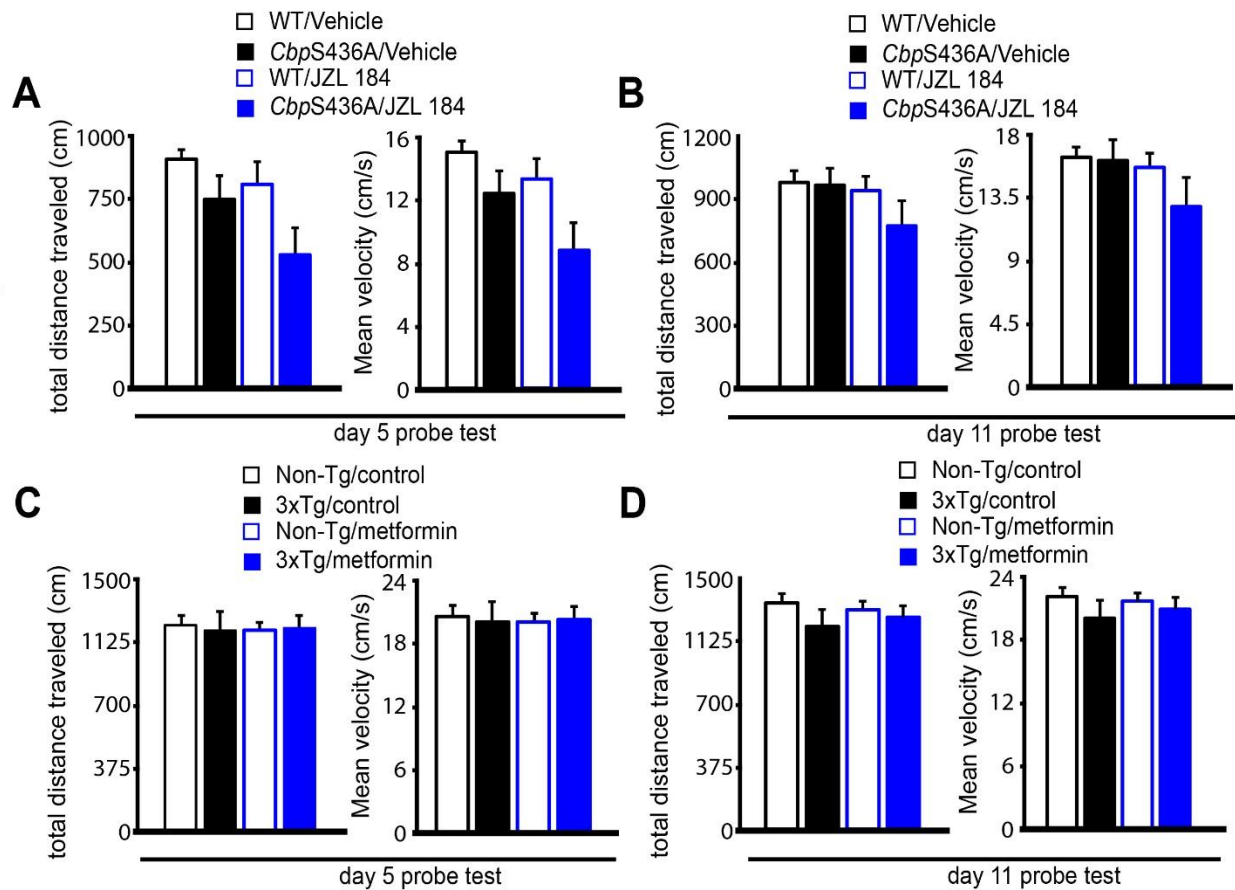

**Figure S2. JZL 184 and metformin does not significantly change general motor activities of WT and *CbpS436A*, and Non-Tg and 3xTg-AD mice, respectively.** (A-B) Analysis of the total distance travelled and the mean velocity during short-term MWM probe test (A, day 5) and long-term MWM probe test (B, day 11) for 6-month WT and *CbpS436A* mice that received either vehicle or JZL 184 treatment. (C-D) Analysis of the total distance travelled and the mean velocity during short-term MWM probe test (C, day 5) and long-term MWM probe test (D, day 11) for Non-Tg and 3xTg-AD mice that received either control or metformin treatment.

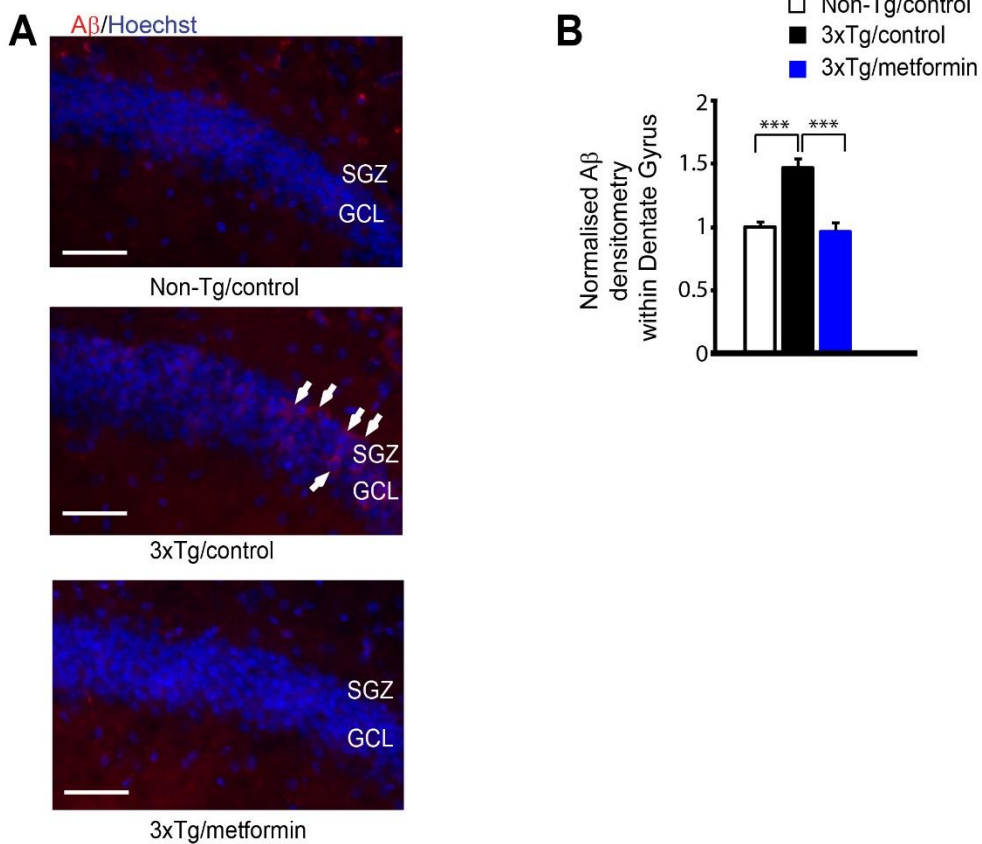

**Figure S3. Metformin treatment removes intracellular  $\beta$ -amyloid accumulation from 3xTg hippocampal dentate gyrus.** (A-B) Quantification by densitometry of  $\beta$ -amyloid ( $A\beta$ ) immunoreactivity in the hippocampal dentate gyrus as in **A**; measurements were normalized to one of sections from Non-Tg/control group. (n=20-30 section/group). Data analysis was performed using one-way ANOVA ( $F(2,136) = 34.42, P < 0.0001, n=139$ ) \*\*\*  $p < 0.001$ . Scale bar: 100  $\mu\text{m}$ .

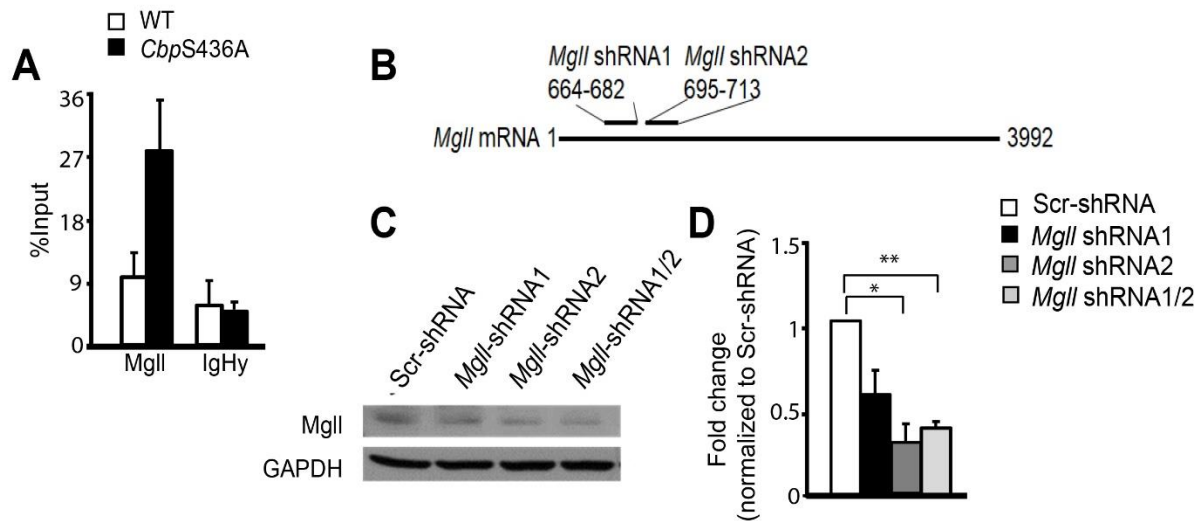

**Figure S4. (A) ChIP-qPCR analysis for CBP binding at *MgII* promoter in differentiating WT and *CbpS436A* NPCs in the presence of metformin.** ChIP analysis was performed to analyze the enrichment of CBP at the *MgII* promoter. IgHy enhancer was used as a negative control. (n=3 animals/group). **(B-D) Efficiency of shRNA-mediated *MgII* knockdown.** (B) Schematic representing *MgII* shRNAs target regions. (C) Representative western blot images of total protein lysates from NIH3T3 cells transfected with *MgII* shRNAs and a Scr shRNA, probed for *MgII* and GAPDH (a loading control). (D) Quantitative analysis of *MgII* expression in NIH3T3 cells 48 h after shRNA transfection, normalized to GAPDH. Data from 3 independent experiments was analyzed using one-way ANOVA ( $F(3, 8) = 10.09$ ,  $P = 0.0043$ ) with Dunnett's post-hoc test. \*  $P < 0.05$ , \*\*  $P < 0.01$ . (Scr sh: Scramble shRNA; *MgII* sh1: *MgII* shRNA 1; *MgII* sh2: *MgII* shRNA 2).

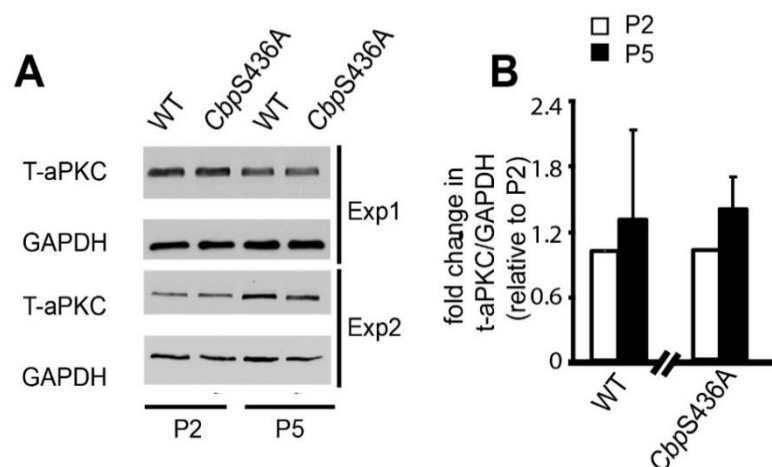

**Figure S5. Continued passaging does not change total aPKC protein levels. (A)**

Representative western blot images of total protein lysates from proliferating P2 (early passage) and P5 (late passage) WT and *CbpS436A* NPCs, probed for total aPKC and GAPDH (a loading control) from experiment1 (top panel) and 2 (bottom panel). (B) Quantitative analysis of total aPKC expression, relative to GAPDH in proliferating P2 and P5 WT and *CbpS436A* NPCs. Data was normalised to corresponding P2 NPCs for each genotype.

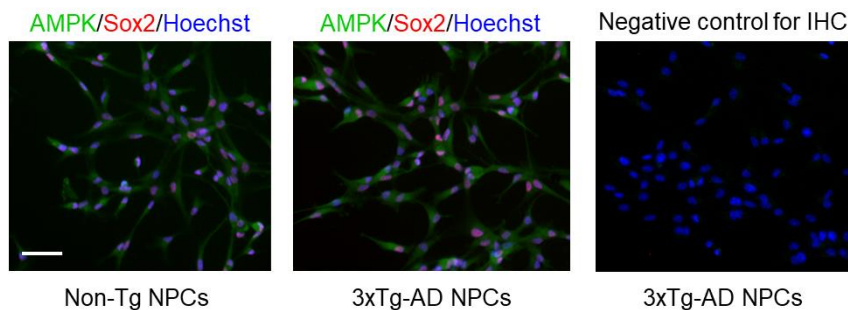

**Figure S6. AMPK protein expression in 3xTg-AD and Non-Tg NPCs.** Immunofluorescent images of cultured P2 NPCs from 3xTg-AD and Non-Tg mice, immunostained for Sox2 (red) and AMPK (green), counterstained for Hoechst (blue). Negative control for IHC image was from 3xTg-AD NPCs that received only secondary antibody incubation. Scale bar: 50  $\mu$ m.

|                 |      | Age | sex | post-mortem (hour) |  |  |
|-----------------|------|-----|-----|--------------------|--|--|
| Healthy control | C-1  | 61  | M   | 12                 |  |  |
|                 | C-2  | 75  | M   | 24                 |  |  |
|                 | C-3  | 81  | F   | 18                 |  |  |
|                 | C-4  | 80  | F   | 18                 |  |  |
|                 | C-5  | 89  | M   | 20                 |  |  |
| AD patients     | AD-1 | 59  | M   | 4                  |  |  |
|                 | AD-2 | 70  | M   | 26                 |  |  |
|                 | AD-3 | 76  | M   | 24                 |  |  |
|                 | AD-4 | 79  | F   | 9                  |  |  |
|                 | AD-5 | 81  | F   | 6                  |  |  |
|                 | AD-6 | 84  | M   | 13                 |  |  |

**Table S1. Human post-mortem samples information regarding age, sex and post-mortem delay in tissue fixation.** Human DG sections were stored in antifreeze solution (40% PBS, 30% Glycerol) at -20°C.



| gene_short_name | log2_fold_change | Ensembl ID         | Species      | Gene Name                                                                                                                                  |
|-----------------|------------------|--------------------|--------------|--------------------------------------------------------------------------------------------------------------------------------------------|
| 9930013L23Rik   | 1.27506          | ENSMUSG00000052353 | Mus musculus | RIKEN cDNA 9930013L23 gene                                                                                                                 |
| A2m             | 0.80783          | ENSMUSG00000030111 | Mus musculus | alpha-2-macroglobulin                                                                                                                      |
| Abca9           | 1.18481          | ENSMUSG00000041797 | Mus musculus | ATP-binding cassette, sub-family A (ABC1), member 9                                                                                        |
| Atp1a2          | 1.16923          | ENSMUSG0000007097  | Mus musculus | ATPase, Na <sup>+</sup> /K <sup>+</sup> transporting, alpha 2 polypeptide                                                                  |
| Cdkn1c          | 2.20316          | ENSMUSG00000037664 | Mus musculus | cyclin-dependent kinase inhibitor 1C (P57)                                                                                                 |
| Chgb            | 2.04785          | ENSMUSG00000027350 | Mus musculus | chromogranin B                                                                                                                             |
| Chl1            | 1.35974          | ENSMUSG00000030077 | Mus musculus | cell adhesion molecule with homology to L1CAM                                                                                              |
| Col18a1         | 2.08565          | ENSMUSG00000001435 | Mus musculus | collagen, type XVIII, alpha 1                                                                                                              |
| Csrnp1          | -1.21314         | ENSMUSG00000032515 | Mus musculus | cysteine-serine-rich nuclear protein 1                                                                                                     |
| Dio2            | 1.66036          | ENSMUSG00000007682 | Mus musculus | deiodinase, iodothyronine, type II                                                                                                         |
| Dmrta2          | 3.00771          | ENSMUSG00000047143 | Mus musculus | doublesex and mab-3 related transcription factor like family A2                                                                            |
| Dusp5           | -1.1296          | ENSMUSG00000034765 | Mus musculus | dual specificity phosphatase 5                                                                                                             |
| Egr1            | -1.32754         | ENSMUSG00000038418 | Mus musculus | early growth response 1                                                                                                                    |
| Egr2            | -1.93359         | ENSMUSG00000037868 | Mus musculus | early growth response 2                                                                                                                    |
| Eps8l1          | 4.1267           | ENSMUSG00000006154 | Mus musculus | EPS8-like 1                                                                                                                                |
| Fam178a         | 0.864121         | ENSMUSG00000036097 | Mus musculus | family with sequence similarity 178, member A                                                                                              |
| Fbln5           | 1.43958          | ENSMUSG00000021186 | Mus musculus | fibulin 5                                                                                                                                  |
| Fosb            | -2.72036         | ENSMUSG00000003545 | Mus musculus | FBJ osteosarcoma oncogene B                                                                                                                |
| Gad1            | 3.09252          | ENSMUSG00000070880 | Mus musculus | glutamic acid decarboxylase 1                                                                                                              |
| Gfap            | 0.820592         | ENSMUSG00000020932 | Mus musculus | glial fibrillary acidic protein                                                                                                            |
| Gria1           | 0.754434         | ENSMUSG00000020524 | Mus musculus | glutamate receptor, ionotropic, AMPA1 (alpha 1); similar to Glutamate receptor, ionotropic, AMPA1 (alpha 1)                                |
| Gucy1a3         | 1.69036          | ENSMUSG00000033910 | Mus musculus | guanylate cyclase 1, soluble, alpha 3                                                                                                      |
| Hopx            | 1.61918          | ENSMUSG00000059325 | Mus musculus | HOP homeobox                                                                                                                               |
| Lmx1a           | 4.10731          | ENSMUSG00000026686 | Mus musculus | LIM homeobox transcription factor 1 alpha                                                                                                  |
| Maf             | 0.860591         | ENSMUSG00000055435 | Mus musculus | similar to c-Maf long form; avian musculoaponeurotic fibrosarcoma (v-maf) AS42 oncogene homolog                                            |
| Mgl1            | 1.51722          | ENSMUSG00000033174 | Mus musculus | monoglyceride lipase                                                                                                                       |
| Mki67           | 1.12498          | ENSMUSG00000031004 | Mus musculus | antigen identified by monoclonal antibody Ki 67                                                                                            |
| Nkain2          | -1.14397         | ENSMUSG00000069670 | Mus musculus | Na <sup>+</sup> /K <sup>+</sup> transporting ATPase interacting 2                                                                          |
| Nr4a1           | -1.59272         | ENSMUSG00000023034 | Mus musculus | nuclear receptor subfamily 4, group A, member 1                                                                                            |
| Pbk             | 1.73027          | ENSMUSG00000022033 | Mus musculus | PDZ binding kinase                                                                                                                         |
| Pcp4l1          | 0.948439         | ENSMUSG00000038370 | Mus musculus | Purkinje cell protein 4-like 1                                                                                                             |
| Per1            | -0.754279        | ENSMUSG00000020893 | Mus musculus | period homolog 1 (Drosophila)                                                                                                              |
| Pgm5            | 1.99293          | ENSMUSG00000041731 | Mus musculus | phosphoglucomutase 5                                                                                                                       |
| Pmaip1          | -1.53678         | ENSMUSG00000024521 | Mus musculus | phorbol-12-myristate-13-acetate-induced protein 1                                                                                          |
| Prc1            | 1.10732          | ENSMUSG00000038943 | Mus musculus | protein regulator of cytokinesis 1                                                                                                         |
| Rbp1            | -1.23272         | ENSMUSG00000046402 | Mus musculus | retinol binding protein 1, cellular                                                                                                        |
| Sh3bp5          | 1.04966          | ENSMUSG00000021892 | Mus musculus | SH3-domain binding protein 5 (BTK-associated)                                                                                              |
| Slc6a15         | -1.02873         | ENSMUSG00000019894 | Mus musculus | solute carrier family 6 (neurotransmitter transporter), member 15                                                                          |
| Syt12           | 0.87338          | ENSMUSG00000030616 | Mus musculus | synaptotagmin-like 2                                                                                                                       |
| Tagln3          | 0.91303          | ENSMUSG00000022658 | Mus musculus | transgelin 3                                                                                                                               |
| Thy1            | 1.02941          | ENSMUSG00000032011 | Mus musculus | thymus cell antigen 1, theta                                                                                                               |
| Tmem163         | 1.802            | ENSMUSG00000026347 | Mus musculus | hypothetical protein LOC100047091; transmembrane protein 163                                                                               |
| Top2a           | 1.17366          | ENSMUSG00000020914 | Mus musculus | topoisomerase (DNA) II alpha                                                                                                               |
| Wbscr17         | 1.44404          | ENSMUSG00000034040 | Mus musculus | Williams-Beuren syndrome chromosome region 17 homolog (human); similar to UDP-GalNAc:polypeptide N-acetyl-galactosaminyltransferase-like 3 |
| Wisp2           | 0.933059         | ENSMUSG00000027656 | Mus musculus | WNT1 inducible signaling pathway protein 2                                                                                                 |
| Zic1            | 1.6321           | ENSMUSG00000032368 | Mus musculus | similar to Zic protein; zinc finger protein of the cerebellum 1                                                                            |
| Zic2            | 1.65671          | ENSMUSG00000061524 | Mus musculus | zinc finger protein of the cerebellum 2                                                                                                    |
| Zic3            | 1.94374          | ENSMUSG00000067860 | Mus musculus | zinc finger protein of the cerebellum 3                                                                                                    |

**Table S2. RNA-seq analysis from differentiating WT and *CbpS436A* NPCs in the presence of metformin for 6 days.**
